# Supplementary material
Source: PubMed Central journal article supplement (PMC8092494)
Supplement: AAC.01945-20-s0001.pdf [file AAC.01945-20-s0001.pdf]

Supplemental Figure 1. Animal dosing flow chart

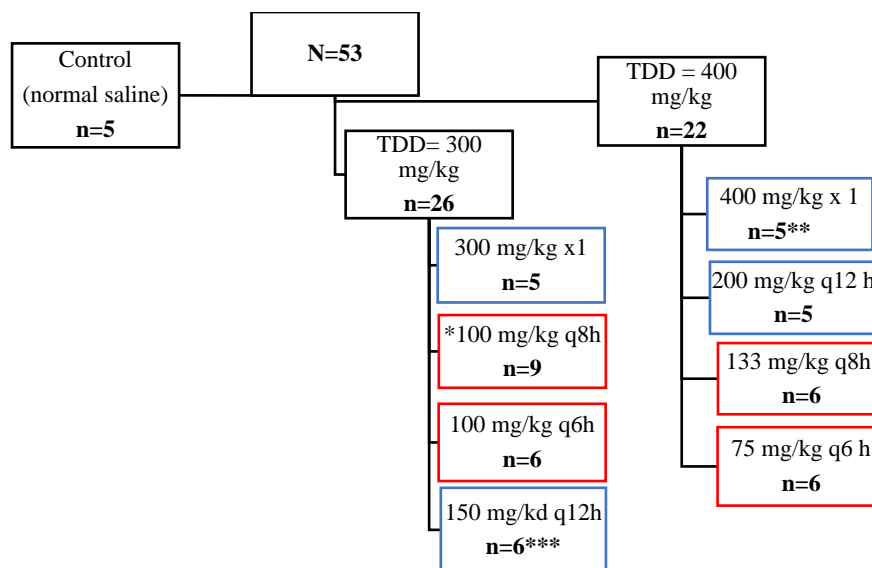

\*100 mg/kg q8h group was repeated

\*\*1 animal contributed partial PK

\*\*\*2 animals contributed partial PK or TD

Note: All 53 animals that received vancomycin were included in the PK model build.

New animals

Previous animals (7)

Abbreviations: IV = intravenous, TDD = total daily dose, x1= once daily dose, q8h = thrice daily dose, q6h = 4x daily dose, q12h=twice daily dose
